# Supplementary material
Source: PubMed Central journal article supplement (PMC5943157)
Supplement: NIHMS949715-supplement-Supp_FigS1.pdf [file NIHMS949715-supplement-Supp_FigS1.pdf]

## Figure S1. Intergenic sequences between *flhC* and *motA* for 99 proteobacterial species.

### Species where Asp178 of FlhC is conserved

>D319\_RS0112640|Arsenophonus\_endosymbiont\_of\_Nilaparvata\_lugens\_GCF\_000757905.1\_ASM75790v1|D319\_RS0112640 D319\_RS0112640; downstream from 1 to 124; size: 124; feature type:gene; location: Arsenophonus\_endosymbiont\_of\_Nilaparvata\_lugens\_GCF\_000757905.1\_ASM75790v1:NZ\_JRLH01000021.1:5968:6091:R; downstream neighbour: D319\_RS0112635 (distance: 124)  
TGGAGCAACTGAGCTTATAAAATAGAGAATTATGGTTTAGGTTTACCATAGCTCTCTTAT  
AGGTCGGTATGTTAGCTTTGAATACGGATCTCTAGTTCATCATTATCAATAAAGGGAATA  
TCAG

>EH105704\_RS01935|Atlantibacter\_hermannii\_GCF\_000248015.1\_ASM24801v2|EH105704\_RS01935 EH105704\_RS01935; downstream from 1 to 124; size: 124; feature type:gene; location: Atlantibacter\_hermannii\_GCF\_000248015.1\_ASM24801v2:NZ\_BAFF01000001.1:350450:350573:R; downstream neighbour: EH105704\_RS01930 (distance: 124)  
GCTTCAGATGTGGTGAAACACTCCAGCAGCGCCAGGTTTCCTGTCGCTGCTTTTTTTTCG  
CCCTCCGTCGCTGAGCCCTTCGCTTGCCAATCCTTGTCCCAGCCAACAGCGGAAGGAAGA  
TGTC

>BWI17\_RS17980|Betaproteobacteria\_bacterium\_GR16-43\_GCF\_001953215.1\_ASM195321v1|BWI17\_RS17980 BWI17\_RS17980; downstream from 1 to 308; size: 308; feature type:gene; location: Betaproteobacteria\_bacterium\_GR16-43\_GCF\_001953215.1\_ASM195321v1:NZ\_CP019169.1:3859807:3860114:R; downstream neighbour: BWI17\_RS17975 (distance: 308)  
GGGTTTGTCAAAAAGCATTGAACCGCAGAGGCCCGGAGGCCCGGAGAAAAGCCTGTTT  
GGCTGGATGCTCTTCTTGGCGGTGATGACAGCAGAACGGGAATGCCACTGACCAGATCGG  
CTCTTGACGGGTTTGGCTTTTCTCCGGGCTCAGGGGCTCTGCGGTTCAATGCCTTTT  
GCATGCCCTTCCCGATCCCTAAAGAAACCCCGTTCCAAGCCGTAATTCCTTCGGGAACG  
GGCGTCATGGGACGCTCGACGGTTCGCGCCTCACCGGCAACGGCGGGGATGACGAGAGGG  
AAGATTTCG

>BN1221\_RS21630|Brenneria\_goodwinii\_GCF\_001049335.1\_B\_goodwinii\_PB|BN1221\_RS21630 BN1221\_RS21630; downstream from 1 to 135; size: 135; feature type:gene; location: Brenneria\_goodwinii\_GCF\_001049335.1\_B\_goodwinii\_PB:NZ\_CGIG01000001.1:4973401:4973535:R; downstream neighbour: BN1221\_RS21625 (distance: 135)  
GCTTGGTAGCGATTTGTGAATCTATCACTGTTTGTATTGAGGGCAGTGATAGATTTCTC  
CTCAAGTAATTCCTGGCTTTATAACCGCTGCGTTTTTATCTAATCTTCCGCTACCTTTTT  
TTATAAGGAATTCTT

>GBAG\_RS11615|Buttiauxella\_agrestis\_GCF\_000735355.1\_GBAG\_DRAFTv1|GBAG\_RS11615 GBAG\_RS11615; downstream from 1 to 127; size: 127; feature type:gene; location: Buttiauxella\_agrestis\_GCF\_000735355.1\_GBAG\_DRAFTv1:NZ\_JMPI01000030.1:288406:288532:R; downstream neighbour: GBAG\_RS11610 (distance: 127)  
CAGTTCGGTGTGGTAAACACTCCAGCAGCGATAAGCCATTATCGCTGCTTTTTTTTGCCC  
CGCATCTGACTGTTTTTCCCTTTGATTTGTGATTCTCGTCACATTTAACAGCAGAAGGA  
TGTACTION

>HMPREF0201\_RS12215|Cedecea\_davisae\_GCF\_000412335.2\_ASM41233v2|HMPREF0201\_RS12215 HMPREF0201\_RS12215; downstream from 1 to 126; size: 126; feature type:gene;

location:

Cedecea\_davisae\_GCF\_000412335.2\_ASM41233v2:NZ\_KE161030.1:2687632:2687757:R;  
downstream neighbour: HMPREF0201\_RS12210 (distance: 126)  
CAGATTCTGTGTTTGGAGCATTCCAGCAGCGGTGAGTGATTGCCGCTGCTTTTTTTATGCC  
CGCACATAACGCTGCTTCTGCCTTCTGGGCATCCTCGCTACACTCAACGGCGTAAGGAT  
GATCTC

>Z042\_RS18555|Chania\_multitudinisentens\_GCF\_000520015.2\_ASM52001v2|Z042\_RS18555  
Z042\_RS18555; downstream from 1 to 156; size: 156; feature type:gene;

location:

Chania\_multitudinisentens\_GCF\_000520015.2\_ASM52001v2:NZ\_CP007044.2:4182972:418312  
7:R; downstream neighbour: Z042\_RS18550 (distance: 156)  
GTCTGCAATAAGGCCGATTCACTACAGCTAAACCAGATAAGTGAAACGCAGAGGCTCAAC  
TTATCGAGTCTAGGGCGTGGCTTGAGCTGTGTATCTGTCATTTCATCCGAACCGATGATCC  
CACGTCCACCTCACCTTGTGCATTTAAGGAACACGC

>DQ02\_RS06235|Citrobacter\_amalonaticus\_GCF\_000731055.1\_ASM73105v1|DQ02\_RS06235  
DQ02\_RS06235; downstream from 1 to 125; size: 125; feature type:gene;

location:

Citrobacter\_amalonaticus\_GCF\_000731055.1\_ASM73105v1:NZ\_JMQQ01000013.1:102527:1026  
51:R; downstream neighbour: DQ02\_RS06230 (distance: 125)  
CCGATACGGTGTGGACGAAACACTCCAGCAGCGGTAAGTCATTACCGCTGCTTTTTTTTGG  
CCTCGCCAACGCGTTAACGCCCCGACTGCACATCCTGTCATAGTCAACAGCAGAAGGATG  
ATGTC

>M983\_RS02530|Cosenzaea\_myxofaciens\_GCF\_001654855.1\_Cmy19692\_DRAFTv1|M983\_RS02530  
M983\_RS02530; downstream from 1 to 133; size: 133; feature type:gene;

location:

Cosenzaea\_myxofaciens\_GCF\_001654855.1\_Cmy19692\_DRAFTv1:NZ\_LXEN01000019.1:53346:53  
478:R; downstream neighbour: M983\_RS02525 (distance: 133)  
TTCGAGATTGAAAGTTAACTATCAGGTTATAGAAATCAGTTATCTATAACCTGAGTCACT  
CCTCTTACCCTCCTATCCTTTGCTGCTATGTTAGCCATTCTATCTATAACGAAATTAGCT  
AAAGGGATATCGC

>BN137\_RS04585|Cronobacter\_condimenti\_GCF\_000319285.1\_ASM31928v1|BN137\_RS04585  
BN137\_RS04585; downstream from 1 to 130; size: 130; feature type:gene;

location:

Cronobacter\_condimenti\_GCF\_000319285.1\_ASM31928v1:NZ\_CAKW01000118.1:57549:57678:R  
; downstream neighbour: BN137\_RS04590 (distance: 130)  
CCGGATAGGTGTGGAAAACCACTCCAGCAGCGGCCAAAAGGCCGCTGCTTTTTTTTCTCCT  
AACTTAAACCGCAACGTTTTCTGCTTACCTGAACGTCCTCGCCATAGCCAACAGCGGAA  
GGATGATGTC

>DCH516\_RS07695|Dickeya\_chrysanthemi\_GCF\_000406065.1\_DCH516\_1.0|DCH516\_RS07695  
DCH516\_RS07695; downstream from 1 to 133; size: 133; feature type:gene;

location:

Dickeya\_chrysanthemi\_GCF\_000406065.1\_DCH516\_1.0:NZ\_CM001904.1:1648499:1648631:D;  
downstream neighbour: DCH516\_RS07700 (distance: 133)  
GCCTGATGGCGATTTTGTGGTTCTGTCATCGCGGTTTCATTGCTCGATGGCAGTATTCCC  
TCCAAATAAGTCGTTGGTAAGACTGCATTTATAACCCTCTCCGCTACCCTTTTACTATCT  
ATAAGGAATTCTT

>ETEE\_RS15000|Edwardsiella\_anguillarum\_GCF\_000264765.2\_ASM26476v2|ETEE\_RS15000  
ETEE\_RS15000; downstream from 1 to 153; size: 153; feature type:gene;

location:

Edwardsiella\_anguillarum\_GCF\_000264765.2\_ASM26476v2:NZ\_CP006664.1:3331772:3331924  
:D; downstream neighbour: ETEE\_RS15005 (distance: 153)

CTGATTGAGGCAATCAGTCCAATAGCGTGCGGTGCAGCGGTAGTGCTGCCGCACGCTGTC  
TTCGGGCAGCATTCTGTCATCGACCTTCTTCCGGCTTTGCGCCGGCAGATTACATC  
CGACTGTTCACTCCGATCATGTAAGGAATTCAC

>ENTAS\_RS13140|Enterobacter\_asburiae\_GCF\_000224675.1\_ASM22467v1|ENTAS\_RS13140  
ENTAS\_RS13140; downstream from 1 to 123; size: 123; feature type:gene;  
location:  
Enterobacter\_asburiae\_GCF\_000224675.1\_ASM22467v1:NC\_015968.1:2802771:2802893:R;  
downstream neighbour: ENTAS\_RS13135 (distance: 123)  
CCCGAACGTGTGGCAAGATTCCAGCAGCGGTAAGAAATTACCGCTGCTTTTTTTTACCC  
CGCATTCCGGTCACACACTCGAAATGAACGTCTCCTGCCTTAGTCACTAGCGGAAGGATGAT  
GTC

>HMPREF0864\_RS15025|Enterobacteriaceae\_bacterium\_9\_2\_54FAA\_GCF\_000185685.2\_Entebact\_9\_2\_54FAA\_V2|HMPREF0864\_RS15025 HMPREF0864\_RS15025; downstream from 1 to 184; size: 184; feature type:gene; location:  
Enterobacteriaceae\_bacterium\_9\_2\_54FAA\_GCF\_000185685.2\_Entebact\_9\_2\_54FAA\_V2:NZ\_ADCU02000001.1:3344735:3344918:R; downstream neighbour: HMPREF0864\_RS15020 (distance: 184)  
CCTGATTGAGGCAATCAGTCTTATAGGTTGGCGATCGGTGGTGTGGCTTTAAACGATGTT  
ATCAGGTCAACCCACCGGTTATCTTCTTTTCGAGCCGTCATCCGACGGCCTCTGAATTCT  
CCTTCTCCGTCTCCCGGACAGCGGTTACACCCAATTTCCATTTTGAGCATTAAAGGAAT  
TCGC

>EAM\_RS09805|Erwinia\_amylovora\_GCF\_000027205.1\_ASM2720v1|EAM\_RS09805  
EAM\_RS09805; downstream from 1 to 134; size: 134; feature type:gene;  
location:  
Erwinia\_amylovora\_GCF\_000027205.1\_ASM2720v1:NC\_013971.1:2181823:2181956:R;  
downstream neighbour: EAM\_RS09800 (distance: 134)  
TCGCGTCTGCCACACGGAGTGAATCCAGCAGCGGTCTTTGACCGCTGCTTTTTTTTGCCC  
CGTGACTGGCGCACAGATCTGCCTGACTTCTGGCTCTCCTCTCACCCACACGTTTTGCGAG  
CGTAAGGATTTATC

>ESCAB7627\_RS21600|Escherichia\_albertii\_GCF\_000155105.1\_ASM15510v1|ESCAB7627\_RS21600 ESCAB7627\_RS21600; downstream from 1 to 125; size: 125; feature type:gene;  
location:  
Escherichia\_albertii\_GCF\_000155105.1\_ASM15510v1:NZ\_CH991859.1:4351003:4351127:R;  
downstream neighbour: ESCAB7627\_RS21595 (distance: 125)  
CGGAAATGGTGTGGCTAAATATCCCAGCAGCGGTAAGCCATTATCGCTGCTTTTTTTTGCCC  
CTGACCGTGGGTAAACAACCTGGCAACTGAACATCCTGTTCATGGTCAACAGTGAAGGATG  
ATGTC

>GEAM\_RS07005|Ewingella\_americana\_GCF\_000735345.1\_GEAM\_DRAFTv1|GEAM\_RS07005  
GEAM\_RS07005; downstream from 1 to 194; size: 194; feature type:gene;  
location:  
Ewingella\_americana\_GCF\_000735345.1\_GEAM\_DRAFTv1:NZ\_JMPJ01000039.1:40187:40380:D;  
downstream neighbour: GEAM\_RS07010 (distance: 194)  
GATGATGTGGGCAGCATAGTGCAGAAAGGTCACGTGATGCTAAAGAGTGGTGAAATGCCAC  
TCTTTACAATCCCTCCCAACATCCCAATAGTTTTGGTTGTCGGCTGACAAGACAAAAC  
CTCAATTCTCTCTTCAAGCGGCTTCTTCTGGTCTGGCCTATACCCAAAAGCCACATCGA  
ATTAAGGAATCATC

>DW56\_RS01685|Franconibacter\_helveticus\_GCF\_000463115.2\_CroHelLMG23732\_1.0|DW56\_RS01685 DW56\_RS01685; downstream from 1 to 126; size: 126; feature type:gene;  
location:  
Franconibacter\_helveticus\_GCF\_000463115.2\_CroHelLMG23732\_1.0:NZ\_AWFX01000005.1:103313:103438:R; downstream neighbour: DW56\_RS01680 (distance: 126)

CCGGTTCGGTGTGGAACTCACTCCAGCAGCGGCGATTTTCGCCGCTGCTTTTTTTATTCCC  
TCCGTTCCGCTAAACGTCTCTCCATCTGCGCATCCTCACTTTTCGTCAACAGCAGAAGGAT  
GATGTC

>HMPREF0454\_RS07080|Hafnia\_alvei\_GCF\_000239255.1\_ASM23925v1|HMPREF0454\_RS07080  
HMPREF0454\_RS07080; downstream from 1 to 184; size: 184; feature type:gene;  
location: Hafnia\_alvei\_GCF\_000239255.1\_ASM23925v1:NZ\_JH417506.1:42161:42344:D;  
downstream neighbour: HMPREF0454\_RS07085 (distance: 184)  
CCTGATTGAGGCAATCAGTCTTATAGGTTGGCGATCGGTGGTGTGGCTTTAAACGATGTT  
ATCAGGTCAACCCACCGGTTATCTTCCTTTTCGAGCCGTCATCCGACGGCCTCTGAATTCT  
CCTTCTCCGTCTCCCGGACAGCGGTTACACCCAATTTCCATTCTGAGCATTAAAGGAAT  
TCGC

>EAE\_15510|Klebsiella\_aerogenes\_GCF\_000215745.1\_ASM21574v1|EAE\_15510 EAE\_15510;  
downstream from 1 to 141; size: 141; feature type:gene; location:  
Klebsiella\_aerogenes\_GCF\_000215745.1\_ASM21574v1:NC\_015663.1:3353723:3353863:D;  
downstream neighbour: EAE\_15515 (distance: 141)  
GTCGCCGTTCCGACGACTTACGGCAATCCATTTTCGACGTGTAATACGCAGGGGGCGGTATG  
CCGCCCCCATTCCCCGCCTGGTTTACGCCAGGGCGCGTTTGCTCGCCCGCCATCCACA  
TTGTTAATTTGAGGTATGCGT

>GKAS\_RS21160|Kluyvera\_ascorbata\_GCF\_000735365.1\_GKAS\_DRAFTv1|GKAS\_RS21160  
GKAS\_RS21160; downstream from 1 to 122; size: 122; feature type:gene;  
location:  
Kluyvera\_ascorbata\_GCF\_000735365.1\_GKAS\_DRAFTv1:NZ\_JMPL01000147.1:973:1094:R;  
downstream neighbour: GKAS\_RS21155 (distance: 122)  
CCCACACGGTGTGGATAAAACACTCCAGCAGCGGTCTTGATGATCGCTGCTTTTTTTTAC  
CCGTCGGTTAGTGATTTTGCTCATCTGTCTCCACTCATGGTCAACGGTGGAAGGATGATT  
AC

>BWI95\_RS19280|Kosakonia\_cowanii\_GCF\_001975225.1\_ASM197522v1|BWI95\_RS19280  
BWI95\_RS19280; downstream from 1 to 127; size: 127; feature type:gene;  
location:  
Kosakonia\_cowanii\_GCF\_001975225.1\_ASM197522v1:NZ\_CP019445.1:4063376:4063502:R;  
downstream neighbour: BWI95\_RS19275 (distance: 127)  
CCGAATCAGGTGGAATCAAACCTCCAGCAGCGGTGCTTTAATGCCGCTGCTTTTTTTTGC  
CCGCCATTTCGTGAAAACCCTCCGAAATGTTTCTCTTAAGCCTTAGTCATTAGCAGAAGGA  
TGATGTC

>GLAD\_RS19555|Leclercia\_adecarboxylata\_GCF\_000735515.1\_GLAD\_DRAFTv1|GLAD\_RS19555  
GLAD\_RS19555; downstream from 1 to 123; size: 123; feature type:gene;  
location:  
Leclercia\_adecarboxylata\_GCF\_000735515.1\_GLAD\_DRAFTv1:NZ\_JMPM01000048.1:86442:865  
64:R; downstream neighbour: GLAD\_RS19560 (distance: 123)  
CCCGAACGTACGGGCAAGACTCCAGCAGCGGTAAAGCAATTACCGCTGCTTTTTTTTGCCC  
CGCGGTCAGGTAAACCCTCGACCTGTGTCTCCTGGCTAAAGTCACTAGCGGAAGGATGAT  
GTC

>AF34\_RS03465|Lelliottia\_amnigena\_GCF\_000694955.1\_Lell\_amni\_CHS\_78\_V1|AF34\_RS0346  
5 AF34\_RS03465; downstream from 1 to 123; size: 123; feature type:gene;  
location:  
Lelliottia\_amnigena\_GCF\_000694955.1\_Lell\_amni\_CHS\_78\_V1:NZ\_KK737781.1:100257:1003  
79:D; downstream neighbour: AF34\_RS03460 (distance: 123)  
CCCGAACCTGTGGCAAGATTCCAGCAGCGGTAAAGCGATTACCGCTGCTTTTTTTTACCC  
TGCGTTCAGGTCACGCGCTCGAAATGAACGTCTGCCATAGTCACTAGCGGAAGGATGAT  
GTC

>RZ35\_RS09155|Lonsdalea\_quercina\_GCF\_000688655.1\_LonsB104|RZ35\_RS09155  
RZ35\_RS09155; downstream from 1 to 133; size: 133; feature type:gene;  
location:  
Lonsdalea\_quercina\_GCF\_000688655.1\_LonsB104:NZ\_JIBO01000008.1:49956:50088:R;  
downstream neighbour: RZ35\_RS09150 (distance: 133)  
GCTTGGTAGCGCTAGTGAACCTGCCATTGAGCATTGTAGGCATAATGGCAGGGCTCTTTC  
CTTCTGAAGTCGTACGCGATAAGACTGCGTTTTAACCTCACTCCACTACCCCTTGTTACT  
ATAAGGAATGCTT

>A9B99\_RS02380|Mangrovibacter\_phragmitis\_GCF\_001655675.1\_ASM165567v1|A9B99\_RS02380  
A9B99\_RS02380; downstream from 1 to 116; size: 116; feature type:gene;  
location:  
Mangrovibacter\_phragmitis\_GCF\_001655675.1\_ASM165567v1:NZ\_LYRP01000001.1:530272:53  
0387:R; downstream neighbour: A9B99\_RS02375 (distance: 116)  
CGTAACAGGCTCGTAAATCCAGCAGCGGACACGAAAGTGCCGCTGCTTTTTTTTACCCTG  
AATGCAACGTAACCTACTGTTATCCTTGACTTTTAACACAGCGGAAAGGTGATGTC

>VK86\_RS10545|Moellerella\_wisconsensis\_GCF\_001020485.1\_ASM102048v1|VK86\_RS10545  
VK86\_RS10545; downstream from 1 to 79; size: 79; feature type:gene;  
location:  
Moellerella\_wisconsensis\_GCF\_001020485.1\_ASM102048v1:NZ\_LDOF01000056.1:954:1032:D  
; downstream neighbour: VK86\_RS10550 (distance: 79)  
AAAGACAATGTACAGGAATGATGAGCATTCCCGATAATTCAGGCCTATCCCGTCATTTAT  
GTTTTATAAGGAATGTCAT

>MU9\_RS09095|Morganella\_morganii\_GCF\_000286435.2\_ASM28643v2|MU9\_RS09095  
MU9\_RS09095; downstream from 1 to 99; size: 99; feature type:gene; location:  
Morganella\_morganii\_GCF\_000286435.2\_ASM28643v2:NC\_020418.1:1988559:1988657:D;  
downstream neighbour: MU9\_RS09100 (distance: 99)  
CTGGATTGATTTGGTAAACAGGCAAATCCGTTTTGCCTGTCCTTCCTGAAAATTCCTTT  
GACTGCCATCCGATACCTAACTGAGTTAAAGGGAATAGT

>BQ7994\_RS09700|Nissabacter\_archeti\_GCF\_900130115.1\_PRJEB18266|BQ7994\_RS09700  
BQ7994\_RS09700; downstream from 1 to 156; size: 156; feature type:gene;  
location:  
Nissabacter\_archeti\_GCF\_900130115.1\_PRJEB18266:NZ\_FQXW01000005.1:165987:166142:D;  
downstream neighbour: BQ7994\_RS09705 (distance: 156)  
GCGGAATAACGGCAACCTACTGAATTGGGGCCGGCAACAGGCCGCCCCGTTTCAGCAAGC  
ACCACCCCCCGATGTTCCGTGTCCGTGGCGTACGCCCGGCCTCTCCCGCTGTGCGCAAC  
ACCCCGCCTTTCCAACCACTTTATTAAGGAATCATC

>DSM2777\_RS09155|Obesumbacterium\_proteus\_GCF\_001586165.1\_ASM158616v1|DSM2777\_RS09155  
DSM2777\_RS09155; downstream from 1 to 186; size: 186; feature type:gene;  
location:  
Obesumbacterium\_proteus\_GCF\_001586165.1\_ASM158616v1:NZ\_CP014608.1:1964591:1964776  
:D; downstream neighbour: DSM2777\_RS09160 (distance: 186)  
CTTGATTGAGGCAATCAGTCTTATAGGTGCGGATCGGTGGAGTAGCAAGAGCAACGATG  
TTGTTTAGCTAAACCACCGGTTAACTTCCTTTTCGAGCCGTCATCTGACGGCTTCTGAATT  
CTCCTTCTCCGTCTCCTGGACAGCGGTTACACCAATTTCCATTCTAAGCATTAAAGGA  
ATTGCG

>XM39\_RS08495|Pandoraea\_apista\_GCF\_001010785.1\_ASM101078v1|XM39\_RS08495  
XM39\_RS08495; downstream from 1 to 116; size: 116; feature type:gene;  
location:  
Pandoraea\_apista\_GCF\_001010785.1\_ASM101078v1:NZ\_CP011279.1:1890053:1890168:R;  
downstream neighbour: XM39\_RS08490 (distance: 116)  
ACGAGCCCACTTACGAGGTCGCACCCCTACAGTTTCCCTGCGTGTCTGCCGTTAAGCC

CTCTGAACAGGAAGGACATTTTTCCGTAGACGTATTTTTGCGAGAGGTATCCGGCA

>PAGG\_RS08965|*Pantoea agglomerans*\_GCF\_000241285.1\_ASM24128v2|PAGG\_RS08965  
PAGG\_RS08965; downstream from 1 to 133; size: 133; feature type:gene;  
location:

*Pantoea agglomerans*\_GCF\_000241285.1\_ASM24128v2:NZ\_BAEF01000003.1:125112:125244:R;  
downstream neighbour: PAGG\_RS08960 (distance: 133)  
GTTTGTTCGCACTGTGGAAGCCATCCAGCAGCGGTTAATACCGCTGCTTTTTTTTTGCTT  
GCGGTTTCAGGAATAACATCTGCGGCTCTCTGGCTTAACTTCCACCAACACGTTACGGACG  
TAAGGATTTTTTT

>ECA\_RS08345|*Pectobacterium atrosepticum*\_GCF\_000011605.1\_ASM1160v1|ECA\_RS08345  
ECA\_RS08345; downstream from 1 to 134; size: 134; feature type:gene;  
location:

*Pectobacterium atrosepticum*\_GCF\_000011605.1\_ASM1160v1:NC\_004547.2:1935303:1935436  
:D; downstream neighbour: ECA\_RS08350 (distance: 134)  
GCCTGTAGCGATTTGTGAATCTATCACTGTTGGTTGTGACGGCGGTGATAGATTTCTTCC  
TCAAGAACGTCTGGCTACGGCTCCGCAGTTTTATCTCGCTTCCCGCCCACCTTTTTTAT  
TATAAGGATTTCTT

>PAU\_RS13035|*Photorhabdus asymbiotica*\_GCF\_000196475.1\_ASM19647v1|PAU\_RS13035  
PAU\_RS13035; downstream from 1 to 137; size: 137; feature type:gene;  
location:

*Photorhabdus asymbiotica*\_GCF\_000196475.1\_ASM19647v1:NC\_012962.1:3095506:3095642:R  
; downstream neighbour: PAU\_RS13030 (distance: 137)  
ATTTAAATGGGAATTTGTTCTACAGGTTACGGACTTATATTTTTCTTCCTGTAACCTGT  
ATTGAAATTGCCGCATTCTGAATTCTCAAACCTGTTCAACTTCCCATCCGCTCACCACT  
TAGCTAAAGGATATCGC

>EO5\_RS04655|*Plautia stali*\_symbiont\_GCF\_000180175.2\_ASM18017v2|EO5\_RS04655  
EO5\_RS04655; downstream from 1 to 131; size: 131; feature type:gene;  
location:

*Plautia stali*\_symbiont\_GCF\_000180175.2\_ASM18017v2:NC\_022546.1:963125:963255:D;  
downstream neighbour: EO5\_RS04660 (distance: 131)  
GTTTGTTCGCATCGTGAAACATCCAGCAGCGGTTAATACCGCTGCTTTTTTTTTTGCCC  
ACACCCTGCGAATAACACCTACGGCTCTCTGGCTTAACTTCCACCAAACGTTACGGACGT  
AAGATGTTTTT

>LG71\_RS14010|*Pluralibacter gergoviae*\_GCF\_000757785.1\_ASM75778v1|LG71\_RS14010  
LG71\_RS14010; downstream from 1 to 116; size: 116; feature type:gene;  
location:

*Pluralibacter gergoviae*\_GCF\_000757785.1\_ASM75778v1:NZ\_CP009450.1:3027309:3027424:  
D; downstream neighbour: LG71\_RS14015 (distance: 116)  
CCTCCTCTCAGGTGCGGCAAACACCCGGCAGCGGACTTCGGTCCGCTGTTTTTTTTGCCCC  
CTAAACCGCGCGCCGCTGCTTCATCCCTGGCTTTTTAACAGCGGAAGGATGATGTC

>K151\_RS05905|*Proteus hauseri*\_GCF\_000497855.1\_version\_3\_of\_Proteus\_hauseri\_genome  
|K151\_RS05905 K151\_RS05905; downstream from 1 to 134; size: 134; feature  
type:gene; location:

*Proteus hauseri*\_GCF\_000497855.1\_version\_3\_of\_Proteus\_hauseri\_genome:NZ\_AWXP010000  
08.1:488320:488453:D; downstream neighbour: K151\_RS05910 (distance: 134)  
TTCGAGATTGAAAGTTAAATATCAGGTTATAGAGCTGAGTTATCTATAACCTGAACCGTT  
TCCTCTCCCCCTCCTATCTCTTGCTGCTATGTTCCGCAATTCTCTCCATAACGAAATTAGC  
TAAAGGGATATCGC

>PROVALCAL\_RS02420|*Providencia alcalifaciens*\_GCF\_000173415.1\_ASM17341v1|PROVALCAL  
\_RS02420 PROVALCAL\_RS02420; downstream from 1 to 96; size: 96; feature

type:gene; location:

Providencia\_alcalifaciens\_GCF\_000173415.1\_ASM17341v1:NZ\_ABXW01000007.1:19444:19539:D; downstream neighbour: PROVALCAL\_RS02425 (distance: 96)  
TTGGATTAATTTGGTTAACAGGCAAGTAGATTGCCCTGTCCTTCCTCATATTCCCTTTGAC  
TGCCATCTGTAACTAACGGAGTGAAAGGGAATACT

>H597\_RS0122850|Pseudoduganella\_violaceinigra\_GCF\_000425385.1\_ASM42538v1|H597\_RS0122850 H597\_RS0122850; downstream from 1 to 0; size: 0; feature type:gene; location:

Pseudoduganella\_violaceinigra\_GCF\_000425385.1\_ASM42538v1:NZ\_KE384358.1:95444:95443:R; downstream neighbour: H597\_RS0122845 (distance: 0)

>RAHAQ2\_RS08910|Rahnella\_aquatilis\_GCF\_000241955.1\_ASM24195v1|RAHAQ2\_RS08910 RAHAQ2\_RS08910; downstream from 1 to 176; size: 176; feature type:gene; location:

Rahnella\_aquatilis\_GCF\_000241955.1\_ASM24195v1:NC\_016818.1:1950707:1950882:D; downstream neighbour: RAHAQ2\_RS08915 (distance: 176)  
GATAGTTGGGTTGCAGTAAGTCGTTCTGAGCGGTGGTGACCACCGCTCATCAATTTCCCC  
CCAGACATCTCAGTCATTCTCTGACACTTTCTATGCCGTTTCTGCGGCAAAAATGGGTCA  
GGTACATGGCGCGCTTTACCTCGCCCTAAAACCACATCGAATTAAGGATTCATC

>SBG\_RS09065|Salmonella\_bongori\_GCF\_000252995.1\_ASM25299v1|SBG\_RS09065 SBG\_RS09065; downstream from 1 to 124; size: 124; feature type:gene; location:

Salmonella\_bongori\_GCF\_000252995.1\_ASM25299v1:NC\_015761.1:1923244:1923367:R; downstream neighbour: SBG\_RS09060 (distance: 124)  
CCGAAACGGTGTGGACAAACACTCCAGCAGCGGTAAGTCATTACCGCTGCTTTTTTTTGC  
CTTACCATCGCGTTAATTGCCCGACTGCGCATCCTGTCATAGTCAACAGCGGAAGGATGA  
TGTC

>SFI01\_RS01355|Serratia\_ficaria\_GCF\_001590885.1\_ASM159088v1|SFI01\_RS01355 SFI01\_RS01355; downstream from 1 to 159; size: 159; feature type:gene; location:

Serratia\_ficaria\_GCF\_001590885.1\_ASM159088v1:NZ\_BCTS01000002.1:258593:258751:R; downstream neighbour: SFI01\_RS01350 (distance: 159)  
GCCCCGAACATTGCCGTTCTCGGCAGTGAAAACAGACGTGTGATACGCAAGTGGGCGGC  
CATGCCGCCCGTCGACGCAGCCCAATTTGCTGCGCCCGCGGTGCCATGGCGCGTTTG  
CCCCACCTCCATCCACATTGTTAATTTAAGGAATGCGT

>SBO\_RS06185|Shigella\_boydii\_GCF\_000012025.1\_ASM1202v1|SBO\_RS06185 SBO\_RS06185; downstream from 1 to 137; size: 137; feature type:gene; location:

Shigella\_boydii\_GCF\_000012025.1\_ASM1202v1:NC\_007613.1:1120416:1120552:D; downstream neighbour: SBO\_RS06190 (distance: 137)  
CTGATACGGTGTGGCGCAACATGCCAGCAGCGGTAACGACGTACCGCTGCTTTTTTTTGC  
CCCAATCGCGCGTTAACGCCTGACGACTGAACATCCTGTCATGGTCAACAGTGAAGGAT  
GATGTCGTGCTTATCTT

>ET34\_RS0108445|Siccibacter\_colletis\_GCF\_000696575.1\_C\_colletis\_1383|ET34\_RS0108445 ET34\_RS0108445; downstream from 1 to 127; size: 127; feature type:gene; location:

Siccibacter\_colletis\_GCF\_000696575.1\_C\_colletis\_1383:NZ\_JMSQ01000006.1:590593:590719:D; downstream neighbour: ET34\_RS0108450 (distance: 127)  
CAGTTCGGTGTGGTGAACACTCCAGCAGCGGTAAGCAATTACCGCTGCTTTTTTTTACCC  
CAACGAACCCCATAAACGGGCGTCACCTGCAACTCCTCAATGTATTCAACAGCGTAAGGA  
TGATGTC

>SGP1\_RS19025|Sodalis\_glossinidius\_GCF\_000010085.1\_ASM1008v1|SGP1\_RS19025  
SGP1\_RS19025; downstream from 1 to 114; size: 114; feature type:gene;  
location:  
Sodalis\_glossinidius\_GCF\_000010085.1\_ASM1008v1:NC\_007712.1:3570991:3571104:R;  
downstream neighbour: SGP1\_RS19020 (distance: 114)  
CCGCCTGCGGCAGCTGGGTGTCTGCCGCCACGCCGCCACGGAGAAGAAGGGGGTAGCTAA  
GGGTGCCAGCCGGTTCGCTTTTGCCTGCCTGCTCTTCGCTGAAGGAGCGCTATC

>HA49\_RS05315|Tatumella\_morbirosei\_GCF\_000757425.2\_Tmorbiroseiasssem5|HA49\_RS05315  
HA49\_RS05315; downstream from 1 to 117; size: 117; feature type:gene;  
location:  
Tatumella\_morbirosei\_GCF\_000757425.2\_Tmorbiroseiasssem5:NZ\_JPKR02000003.1:529742:5  
29858:R; downstream neighbour: HA49\_RS05310 (distance: 117)  
GTAGTGTTAAATTTATCAAATGTCCGGTAGTAGTGATTTTCTTTGCTTTATTATTGACTT  
TAAATAATTTTACGCATAAATAAATTTTCGTAAGATATCGGCGACGTAAGGGGCTCTCC

>GTGU\_RS00575|Trabulsiella\_guamensis\_GCF\_000734965.1\_ASM73496v1|GTGU\_RS00575  
GTGU\_RS00575; downstream from 1 to 126; size: 126; feature type:gene;  
location:  
Trabulsiella\_guamensis\_GCF\_000734965.1\_ASM73496v1:NZ\_JMTB01000006.1:6422:6547:D;  
downstream neighbour: GTGU\_RS00580 (distance: 126)  
CCGAATCGGTGTGGACAAACACTCCAGCAGCGGTAAGCGATTACCGCTGCTTTTTTTTTGTC  
CCTAACGAAGACGGACAACGCTTATCTGCTCCTCCTCGCCTTAGTCAACAGTGGAAGGAT  
GATGTC

>PSSC\_RS08730|Type-C\_symbiont\_of\_Plautia\_stali\_GCF\_001485315.1\_C\_1.0|PSSC\_RS08730  
PSSC\_RS08730; downstream from 1 to 133; size: 133; feature type:gene;  
location: Type-  
C\_symbiont\_of\_Plautia\_stali\_GCF\_001485315.1\_C\_1.0:NZ\_BBOB01000014.1:77918:78050:D  
; downstream neighbour: PSSC\_RS08735 (distance: 133)  
GTTTTGTTTCGCATCGTGGAAAGCATCCAGCAGCGGTTAATACCGCTGCTTTTTTTTTTGCCC  
ACACCTGCGAATAACACCTGCGGCTCTCTGGCTTAACTTCCACCAACACGTTACGGACG  
TAAGGATGTTTTT

>PSSD\_RS11760|Type-D\_symbiont\_of\_Plautia\_stali\_GCF\_001485335.1\_D\_1.0|PSSD\_RS11760  
PSSD\_RS11760; downstream from 1 to 131; size: 131; feature type:gene;  
location: Type-  
D\_symbiont\_of\_Plautia\_stali\_GCF\_001485335.1\_D\_1.0:NZ\_BBOC01000031.1:20468:20598:R  
; downstream neighbour: PSSD\_RS11755 (distance: 131)  
ATTTGTTTCGCATCGTGGAAAGCATCCAGCAGCGGTTAATCCCGCTGCTTTTTTTTTGCCCCA  
CGATCACCGAATAACACCTGCGGCTCTCTGGCTTAACTTCTACCAACACGTTACGGACGT  
AAGGATTTTTT

>PSSE\_RS05055|Type-E\_symbiont\_of\_Plautia\_stali\_GCF\_001485355.1\_D\_1.0|PSSE\_RS05055  
PSSE\_RS05055; downstream from 1 to 131; size: 131; feature type:gene;  
location: Type-  
E\_symbiont\_of\_Plautia\_stali\_GCF\_001485355.1\_D\_1.0:NZ\_BBOD01000006.1:46583:46713:D  
; downstream neighbour: PSSE\_RS05060 (distance: 131)  
GTTTTGTTTCGCATCGTGGAAAACATCCAGCAGCGGTTAGTCCGCTGCTTTTTTTTTGCCCCA  
CGATTTACGAATAACACCTGCGGCTCTCTGGCTTAACTTCTACCAACACGTTACGGACGT  
AAGGATTTTTT

>PSSF\_RS19745|Type-F\_symbiont\_of\_Plautia\_stali\_GCF\_001485375.1\_F\_1.0|PSSF\_RS19745  
PSSF\_RS19745; downstream from 1 to 132; size: 132; feature type:gene;  
location: Type-



F\_symbiont\_of\_Plautia\_stali\_GCF\_001485375.1\_F\_1.0:NZ\_BBOE01000049.1:21027:21158:D  
; downstream neighbour: PSSF\_RS19750 (distance: 132)  
GTTTGTTCGCACTGTGGAAGCCATCCAGCAGCGGTTAATACCGCTGCTTTTTTTTTTGCTT  
CCGGTTTGAATAACGCCTGCGGCTCTCTGGCTTAACTTCCACCAACACGTTACGGACG  
TAAGGATTTTTT

>WGL\_RS00190|Wigglesworthia\_glossinidia\_GCF\_000008885.1\_ASM888v1|WGL\_RS00190  
WGL\_RS00190; downstream from 1 to 112; size: 112; feature type:gene;  
location:  
Wigglesworthia\_glossinidia\_GCF\_000008885.1\_ASM888v1:NC\_004344.2:38885:38996:D;  
downstream neighbour: WGL\_RS00195 (distance: 112)  
TTAAAATATAATTTTTTAAATTTAAAAATATAATTTTTTAAAATAAAAATACATAATAAATTG  
ATCTTTTTATTAAAAGACATATTTTAAATATTAATTTCTAAGGGATTATT

>XBJ1\_RS08155|Xenorhabdus\_bovienii\_GCF\_000027225.1\_ASM2722v1|XBJ1\_RS08155  
XBJ1\_RS08155; downstream from 1 to 138; size: 138; feature type:gene;  
location:  
Xenorhabdus\_bovienii\_GCF\_000027225.1\_ASM2722v1:NC\_013892.1:1852992:1853129:D;  
downstream neighbour: XBJ1\_RS08160 (distance: 138)  
ATTTAAATGGGAAACTTAAAAGCAGGTTACAGGTTTTTTATGTGCAGACCTGTAACCTTGC  
TCTGTCATACCGTTCTTCGTTTACTAATTCGCCCTGTTCAAATCCCATCTGCTCACCAAC  
TTAGCTAAAGGATATCGC

>YALDO0001\_RS06210|Yersinia\_aldovae\_GCF\_000173735.1\_ASM17373v1|YALDO0001\_RS06210  
YALDO0001\_RS06210; downstream from 1 to 136; size: 136; feature type:gene;  
location:  
Yersinia\_aldovae\_GCF\_000173735.1\_ASM17373v1:NZ\_ACCB01000009.1:67555:67690:R;  
downstream neighbour: YALDO0001\_RS06205 (distance: 136)  
GTTTATTTGAGTTATCAGAATTTTTGGCTACAGCATCGGTATGGATACCGTTGCTGTAAT  
GTTCTAAGACAACCTCATTGCCCTCAAAGGGTGCTAACGCCTCACCTTCCACCCACACACT  
TTGCTAAGGATGTCGC

>HMPREF0880\_RS18420|Yokenella\_regensburgei\_GCF\_000239335.1\_ASM23933v1|HMPREF0880\_  
RS18420 HMPREF0880\_RS18420; downstream from 1 to 124; size: 124; feature  
type:gene; location:  
Yokenella\_regensburgei\_GCF\_000239335.1\_ASM23933v1:NZ\_JH417874.1:1824138:1824261:R  
; downstream neighbour: HMPREF0880\_RS18415 (distance: 124)  
CCTTGACGGCGTGGACAACACTCCAGCAGCGGTAAGCAATTACCGCTGCTTTTTTTTGCC  
CCTCTGTCAGGTTTTCTCTGACGCTGTTTATTCTTGCCTTAGTCAACACTGGAAGGATGA  
TGTC

Species where Asp178 of FlhC is not conserved (putative FlhA promoters identified by MEME are highlighted in yellow)

>KYC\_RS19640|Achromobacter\_arsenitoxydans\_GCF\_000236785.1\_ASM23678v2|KYC\_RS19640  
KYC\_RS19640; downstream from 1 to 118; size: 118; feature type:gene;  
location:  
Achromobacter\_arsenitoxydans\_GCF\_000236785.1\_ASM23678v2:NZ\_AGUF01000062.1:2798:29  
15:R; downstream neighbour: KYC\_RS19635 (distance: 118)  
CCGGGCGTCCAAATACATCAAAAGCCCTGGAAAACCCCCCTAACCCGCCTTTTTGGGTC  
GGGGGGACAGGGGATCATTGACGCCAGTTTTTCAGACTTCGTTGGCAGGGGCCGGAT

>QWA\_RS14775|Alcaligenes\_faecalis\_GCF\_000275465.1\_Gretchen3|QWA\_RS14775  
QWA\_RS14775; downstream from 1 to 191; size: 191; feature type:gene;  
location:  
Alcaligenes\_faecalis\_GCF\_000275465.1\_Gretchen3:NZ\_AKMR01000014.1:97318:97508:R;  
downstream neighbour: QWA\_RS14770 (distance: 191)  
CAATAGCTTTTTGTCTCAGTATGCAGCAAAGCCGGATGGATGCTGGTTTTTGATGTGGAT  
CTGATACCAATCTGAATGTGTCAAGGCAACCGGAAGCGTTGATCTAGGCTGGAAAAAGGC  
CGTTAACGTGTCTGTTTTAGCCCGGTTGCTTGCCGCCATCATTAGCAGCGTGTATTTGAAG  
AAGCGTATCC

>ABG80\_RS16110|Aquabacterium\_parvum\_GCF\_001447195.1\_ASM144719v1|ABG80\_RS16110  
ABG80\_RS16110; downstream from 1 to 297; size: 297; feature type:gene;  
location:  
Aquabacterium\_parvum\_GCF\_001447195.1\_ASM144719v1:NZ\_LFRI01000386.1:439108:439404:  
R; downstream neighbour: ABG80\_RS16105 (distance: 297)  
TTTCACGCGCCTTCAAAAAAGGGCTCAAGTTGCGGGCAGCTCGCCGATACAACA  
GAGCGTCTTTTTGGAAGGAAGGCGTTCTTGCTTGTCTCCTCCTGGCACGAATCCGTGCTT  
TCCTGCGGACCCTGATCGGGTCCGCCTTTTTTTTGGGGCGCCCGCTTGCCTGGGGATTCCA  
TGTGCTGGAAGTTGATCCGAAATAGCGGCTTGC GCGGCGTTGTTACGGGTTC CCGGC  
GGGGCAAGTGGGAACAAGATCACGCCATGACCCGAAACAGCACCTGAGCGAGACCCC

>dqs\_RS07715|Azoarcus\_olearius\_GCF\_001682385.1\_ASM168238v1|dqs\_RS07715  
dqs\_RS07715; downstream from 1 to 139; size: 139; feature type:gene;  
location:  
Azoarcus\_olearius\_GCF\_001682385.1\_ASM168238v1:NZ\_CP016210.1:1663170:1663308:D;  
downstream neighbour: dqs\_RS07720 (distance: 139)  
TTTCCGCCCCATCTCACGGGCCGCTGCGTTAGCAGCGGCCCGTGTCTTTTTCCACG  
GCCGGC GTTCAAGTTGGCGGATGCGGGACGATA CAATTCCGGCGGTCCAAATCTTCGT  
CCGGCTTCTGGAGTAAGCG

>A7W11\_RS15040|Bordetella\_ansorpii\_GCF\_900078315.1\_7642\_7\_30|A7W11\_RS15040  
A7W11\_RS15040; downstream from 1 to 126; size: 126; feature type:gene;  
location:  
Bordetella\_ansorpii\_GCF\_900078315.1\_7642\_7\_30:NZ\_FKBS01000017.1:6080:6205:R;  
downstream neighbour: A7W11\_RS15035 (distance: 126)  
ATTCTTAAGGGTGC GCAAACACGCCAAGAAGCCCGAAAAACCCCGTAACCCCTCGCTT  
TTGCCGAGGGCGGGGCGGGCGATCATTACGGCGGGATTGTTCCGACTACATTGGCAGGGG  
CCTAAT

>AWB78\_RS27405|Burkholderia\_calidae\_GCF\_900044055.2\_Burkholderia\_sp.\_LMG\_29321|AW  
B78\_RS27405 AWB78\_RS27405; downstream from 1 to 129; size: 129; feature  
type:gene; location:  
Burkholderia\_calidae\_GCF\_900044055.2\_Burkholderia\_sp.\_LMG\_29321:NZ\_FCOX02000036.1  
:57284:57412:R; downstream neighbour: AWB78\_RS27400 (distance: 129)  
CGCCGCACCCAGTCGCCACGCGGGGTTTACCGTTTGCCTCCCGCGGAATCAACCTCAA  
AGTTTTTCAGCCGAGTGCCGTAAACCACTTAACGGCGGTCTTACCGCATCAAAACGTGAG

GACTCGACT

>UB46\_RS02275|Burkholderiaceae\_bacterium\_16\_GCF\_000955785.1\_ASM95578v1|UB46\_RS02275  
UB46\_RS02275; downstream from 1 to 457; size: 457; feature type:gene;  
location:

Burkholderiaceae\_bacterium\_16\_GCF\_000955785.1\_ASM95578v1:NZ\_JYOD01000006.1:139657  
:140113:R; downstream neighbour: UB46\_RS02270 (distance: 457)  
CTGAAGCGATTTCGGCTGAGACGCTACCAAGCGGATAGTCCGGGCACATGCCCGGGCTGCC  
GTTGGGAATCCTGCCCGCGTGCCTGGATGCCGGAAGTACCCGGCATCCACGCGTATT  
CCCGTGGCAGCCTGCTAAGCGTACCAACGCTCAGGCAGGGCCATCGCGGGAACCTCGGAAG  
GAAACCAAGCTTATTCGCCGGATCGCCGGTCCCCGCGTTGGAAGATCATCGATGCCGGG  
TCAATAAGTCTTCAAGTCTTGCCGTCTTGCGTCGTTAAGTCATAAGACTGCAAGGCTTCA  
GAACTCCAGATCACTGGGCCTTCAGGTCCTGGGTCTCGGGTCCGAGGGCGGTTTGCCTG  
GTTGGTGAGTCTTGCCAGGGCAGGCGGTAAATCCGCTTCTCCCGGAGGGCGACCTTGTG  
CGTGCTGACGCGTGTCTTCTGACGGGGAATCAATC

>ACU09\_RS02155|Caballeronia\_cordobensis\_GCF\_001278535.1\_ASM127853v1|ACU09\_RS02155  
ACU09\_RS02155; downstream from 1 to 93; size: 93; feature type:gene;  
location:

Caballeronia\_cordobensis\_GCF\_001278535.1\_ASM127853v1:NZ\_LGRC01000001.1:458849:458  
941:D; downstream neighbour: ACU09\_RS02160 (distance: 93)  
CGCGGCGAGAACGCCATATCTCAAAGTTTTTCAGTCGAGTGCCGTAAACCACTTAACGGC  
GGTCTTACCGCATCGAAACGTGAGGACTCGACT

>F615\_RS0100125|Caldimonas\_manganoxidans\_GCF\_000381125.1\_ASM38112v1|F615\_RS0100125  
F615\_RS0100125; downstream from 1 to 202; size: 202; feature type:gene;  
location:

Caldimonas\_manganoxidans\_GCF\_000381125.1\_ASM38112v1:NZ\_KB905929.1:20880:21081:R;  
downstream neighbour: F615\_RS0100120 (distance: 202)  
TTGCCGCCGCGGCGAAGTTTCATCCGTCGTCTCCTCCTGAGCGCCTCGCTGGCGCCTTGA  
CCACGGGCTCCCCGCGAGCCCGTGCTTTTTGGTTCCCCCAAGACGGGCTCAAAGTCAGAGG  
CAAAGCGGTCGATA TCCCCTGGGACCCCGTCAAAGCGCGCACTGCCCGTGGTGCGTCAA  
CCCACCTGGAAAGACCCGCAAC

>CCA01S\_RS03825|Castellaniella\_caeni\_GCF\_001592225.1\_ASM159222v1|CCA01S\_RS03825  
CCA01S\_RS03825; downstream from 1 to 109; size: 109; feature type:gene;  
location:

Castellaniella\_caeni\_GCF\_001592225.1\_ASM159222v1:NZ\_BCWN01000004.1:92030:92138:R;  
downstream neighbour: CCA01S\_RS03820 (distance: 109)  
TTACAGTCAGATACGGGATTTACGTACA AAAAGTCTGTTGAACCATGCTTTTGAAAGCC  
TGAAAACGGGCGAACATTGACATCATTCTGACTATCGAGGCGTGCGCAC

>LT85\_RS05845|Collimonas\_arenae\_GCF\_000786695.1\_ASM78669v1|LT85\_RS05845  
LT85\_RS05845; downstream from 1 to 60; size: 60; feature type:gene;  
location:

Collimonas\_arenae\_GCF\_000786695.1\_ASM78669v1:NZ\_CP009962.1:1290451:1290510:D;  
downstream neighbour: LT85\_RS05850 (distance: 60)  
ATCAGGTGAGCAGTTCCGGTTAGCGTGCCGTTCAAGGTTTATTTCAAGGGGAATCAATA

>OR16\_RS31100|Cupriavidus\_basilensis\_GCF\_000243095.1\_ASM24309v2|OR16\_RS31100  
OR16\_RS31100; downstream from 1 to 241; size: 241; feature type:gene;  
location:

Cupriavidus\_basilensis\_GCF\_000243095.1\_ASM24309v2:NZ\_AHJE01000102.1:4772:5012:D;  
downstream neighbour: OR16\_RS31105 (distance: 241)  
CTGAAATCCTTGGGTCGATAGGTCATAAGTCTTCAAGTCTTGCCGTCTTGAGTCGTTAA  
GTCATAAGACGGACCAGACTTCAGGACCCACGGCTTTAAGGTCCGAACGTCCCAAGGTCT  
CAGATTCGATGGCAGCCTGCGTGACAGGTGAGCCCAGCCAAGGCAGGCGTTAATCCGTC

TGCCTTGAGGGGTGACCCTTGTGCATGCCTGACGTGTGTTTTCTGACGGGAATCAAT  
C

>CDE01S\_RS08735|Curvibacter\_delicatus\_GCF\_001592265.1\_ASM159226v1|CDE01S\_RS08735  
CDE01S\_RS08735; downstream from 1 to 157; size: 157; feature type:gene;  
location:  
Curvibacter\_delicatus\_GCF\_001592265.1\_ASM159226v1:NZ\_BCWP01000015.1:2495:2651:D;  
downstream neighbour: CDE01S\_RS08740 (distance: 157)  
AGTGCTCAAAGACGCCAATTAAATGCCGATAAAGGGTCCTTAGGGCCCTTTTTCACGTT  
TGGCGCACGGGCTGAATCCCCTAGAAATGGTTTGATCTGATTCATCAGTTTGGTTACTTTT  
CCCCAGCTGCAACCCTCAACTCTGACACCGCACCAAC

>OYT1\_RS00615|Ferriphaselus\_amicola\_GCF\_000974685.1\_ASM97468v1|OYT1\_RS00615  
OYT1\_RS00615; downstream from 1 to 207; size: 207; feature type:gene;  
location:  
Ferriphaselus\_amicola\_GCF\_000974685.1\_ASM97468v1:NZ\_BBTH01000001.1:125620:125826  
:R; downstream neighbour: OYT1\_RS00610 (distance: 207)  
TGCAGGCTAGGAGAAATCCCTAAAGTTTTACCCCCATTGGCCGTTACCACCGATATAAGT  
TTTGAGTGGTAACGGCTTTCTTCTTGGCGGGCTTGGGGCAACGGAAGAACAAGTAAGAA  
TAAATCCGGTTAATTGGGTGATTGAGTTTAGCGGGCTGGTGATAATTTGCTAGCCAGTGA  
GACAGAAACGATAAGCAGGGGGCGGTT

>IV91\_RS0102865|Ferrovum\_myxofaciens\_GCF\_000735045.1\_Fv\_myxofaciens\_P3G\_1.0|IV91\_  
RS0102865 IV91\_RS0102865; downstream from 1 to 113; size: 113; feature  
type:gene; location:  
Ferrovum\_myxofaciens\_GCF\_000735045.1\_Fv\_myxofaciens\_P3G\_1.0:NZ\_JPOQ01000011.1:392  
71:39383:D; downstream neighbour: IV91\_RS0102870 (distance: 113)  
AGTTCAAAAAATTAGTGAAAATCCCGCAGACAGGATGCGCTCGCGCTCAATTCATGGT  
TGAATGGCGCCTTGTAACCCTCCAAGAATTTATAACGTATCTGGAGCCTTTCC

>FPB0191\_RS01295|Frischella\_perrara\_GCF\_000807275.1\_ASM80727v1|FPB0191\_RS01295  
FPB0191\_RS01295; downstream from 1 to 65; size: 65; feature type:gene;  
location:  
Frischella\_perrara\_GCF\_000807275.1\_ASM80727v1:NZ\_CP009056.1:266264:266328:R;  
downstream neighbour: FPB0191\_RS01290 (distance: 65)  
ACGAAAAGTAAATTGATTGTGTTAAATAGCATTAAATAGTAATTAATTAAGATAGGGAA  
AATCA

>GALF\_RS05015|Gallionella\_capsiferriiformans\_GCF\_000145255.1\_ASM14525v1|GALF\_RS050  
15 GALF\_RS05015; downstream from 1 to 154; size: 154; feature type:gene;  
location:  
Gallionella\_capsiferriiformans\_GCF\_000145255.1\_ASM14525v1:NC\_014394.1:1061241:1061  
394:D; downstream neighbour: GALF\_RS05020 (distance: 154)  
CAATTTCTTTGTTTTTTCAGGCCGACTAAGCATACTCTGGTCGCGCGCTACCCGTA  
CTAAAAAATAAGCGCATAGTGCAATCTGCCATCACTCGTTTGGCGGATTTGTTTTAGA  
ATGCAGAGGCAGAAATAATACTTAGGAGTGCTGC

>GAPWK\_RS13040|Gilliamella\_apicola\_GCF\_000599985.1\_ASM59998v1|GAPWK\_RS13040  
GAPWK\_RS13040; downstream from 1 to 43; size: 43; feature type:gene;  
location:  
Gilliamella\_apicola\_GCF\_000599985.1\_ASM59998v1:NZ\_CP007445.1:2919131:2919173:D;  
downstream neighbour: GAPWK\_RS13045 (distance: 43)  
AATAAATATTAATAATTAATTAATGATGATAAAAAGGAAAACCA

>CR46\_RS0115550|Halomonas\_alkaliantarctica\_GCF\_000712975.1\_Version\_1.2.07|CR46\_RS  
0115550 CR46\_RS0115550; downstream from 1 to 225; size: 225; feature  
type:gene; location:

Halomonas\_alkaliantarctica\_GCF\_000712975.1\_Version\_1.2.07:NZ\_JHQL01000005.1:22673  
9:226963:R; downstream neighbour: CR46\_RS0115545 (distance: 225)  
ACTACAAAATTATCTTGCCCGGTGCGGTGAGGTATATAGCCAATAAAATGCGTCTTTAA  
CGTATAGATAGCACCAAAGGGGTGGTACTTTTTTCATTAACACCGCCAGCGCCTGAGTA  
AGCTATGGCTAAGAAACGCGTGGAAACCAACGCTCTGTGTTCTCTTTTTGAAACACAGGAA  
TAGCGCTCCACTGATACAAAACACTGATATCGCAAGGATACTGCTT

>HFL01S\_RS18300|Hydrogenophaga\_flava\_GCF\_001571145.1\_ASM157114v1|HFL01S\_RS18300  
HFL01S\_RS18300; downstream from 1 to 152; size: 152; feature type:gene;  
location:  
Hydrogenophaga\_flava\_GCF\_001571145.1\_ASM157114v1:NZ\_BCTF01000022.1:51511:51662:R;  
downstream neighbour: HFL01S\_RS18295 (distance: 152)  
ACGCCTGCTCCGTTCAAACCCCTGAAAAGGACCCTTGCAGGGTCTTTTTTTCGTTTCTGG  
CGGACCTCAATCACCCCTAGAGTTGGACCGATAGGAAAGACAGTCGTTGGGGCATTTGCGC  
TCCGGGTTCCGTTTCAACTCAAGGTTCACTTC

>ISF6\_RS19785|Ideonella\_sakaiensis\_GCF\_001293525.1\_ASM129352v1|ISF6\_RS19785  
ISF6\_RS19785; downstream from 1 to 385; size: 385; feature type:gene;  
location:  
Ideonella\_sakaiensis\_GCF\_001293525.1\_ASM129352v1:NZ\_BBYR01000050.1:7240:7624:D;  
downstream neighbour: ISF6\_RS19790 (distance: 385)  
GTTCCACCGGGGCGAGCCCCCGCCTTTCAGTTCCGCGCCGCGCGCCGATAGAAGGAAG  
GCGAACGGCTCTCCCTGCGGGGAGCCGACGTTGGCTCGAAGTTTGCTTGGGTCTTTTGC  
TTTTGTTTCGTTTCGTGTCTCCTCCTGGCACATCCCCGCATGTGCTTTCGACCACGGGCC  
TTCGGGCCCGTTTTTTTTTGGTCCGGCGCATCCCCCGGGCCGAGGTGGTGCCGGCGGTT  
TGGCCCGCTTTCCCGCCTCATCGGCCGATGGCCCCCGCGCTCGCCGCCGACACTCAA  
GACCTGGGCTCCCCGTCCGATA TAGGACGCGACCGGCGCCCGGTTTCTGGATGGATCCCG  
CCCCCACCACGGATTTCCCGACC

>AAV32\_RS11395|Kerstersia\_gyiorum\_GCF\_000988095.1\_ASM98809v1|AAV32\_RS11395  
AAV32\_RS11395; downstream from 1 to 150; size: 150; feature type:gene;  
location:  
Kerstersia\_gyiorum\_GCF\_000988095.1\_ASM98809v1:NZ\_LBNE01000007.1:126728:126877:D;  
downstream neighbour: AAV32\_RS11400 (distance: 150)  
CGCCGCGGTAGGGACGGCAGTCTAGCCGTCCCGCTCTCTCAAAGCGGCAAGGAATGCCGC  
AAAAATCGTTCTGACTCACGCTTCCCGGATGCTTTCCGGTTGAAGATTAGGCTTTCTT  
GCGGCTTTTTTCGAGCTAAGGGCTTTTTATT

>H146\_RS0112390|Kushneria\_aurantia\_GCF\_000382245.1\_ASM38224v1|H146\_RS0112390  
H146\_RS0112390; downstream from 1 to 326; size: 326; feature type:gene;  
location:  
Kushneria\_aurantia\_GCF\_000382245.1\_ASM38224v1:NZ\_KB907878.1:47005:47330:R;  
downstream neighbour: H146\_RS0112385 (distance: 326)  
GCTATCACTCCCGCTTCTAATGCGGTGACACGAATCGTAACCTTTTTCAAGCCCCTGGCAC  
TCAGTGTCAAGGGCTTTCTATCTCCTCCCCAAAGCCGCGGTGCGCTTGTCTTTCAGA  
ATATTTAAAGCGTGAATTGAGAGCTTTTTTGGCGGTACGTCCAGCGCTGAAGCGCTCCTG  
TCCTGTTCCATAATCGTTACCGATCCGCTTGGTTGGCAGGTATTTTCGCGCTGCCATATGA  
AATCGCCATGTGAAACAGGCTTCATACTCAAGTCCAGGCGTTTTCTGCCGATGTTACAGG  
CAGGTCACGAACGCCGAGGAAATGCA

>HMPREF0551\_RS06190|Lautropia\_mirabilis\_GCF\_000186425.1\_ASM18642v1|HMPREF0551\_RS0  
6190 HMPREF0551\_RS06190; downstream from 1 to 399; size: 399; feature  
type:gene; location:  
Lautropia\_mirabilis\_GCF\_000186425.1\_ASM18642v1:NZ\_GL636062.1:1478200:1478598:R;  
downstream neighbour: HMPREF0551\_RS06185 (distance: 399)  
CAGGTCGACTGAACTCCGGCTGGCTGGCCACCTCCATTCCGTCTGCAGCGATCCGAGGG  
TTCGGATCGCTGCAGGAAGGGCAAGGCGCGCCAGCCCGAACATGCGAAGCATTTTTTGGG

CATTCGGACGGATCTTTCGGGATCCTGATGAATGCCTTTTTTTCATGGGCGTTTCCTTGGC  
CTTGGGGAGTTTGACCATGGATCGAGCCTGAAAGTGTTCCTGGATATATCCACTGTCC  
CTGACAGGTGCCCCGACCTGACGCCGTTCCCGCTGGGTGTCCGTCTGACCGTCATGGGTG  
CCGCAGGGCAGGGCGATGCTCAAGAATGCCGGGTATCGACCGATAAGGAGGGGAGCCCCG  
GGCCCATGCCCGGTGTGAACCAGTCAAGGGATACACAAC

>H663\_RS15295|Limnohabitans\_planktonicus\_GCF\_001270065.1\_ASM127006v1|H663\_RS15295  
H663\_RS15295; downstream from 1 to 148; size: 148; feature type:gene;  
location:  
Limnohabitans\_planktonicus\_GCF\_001270065.1\_ASM127006v1:NZ\_LFYT01000007.1:610169:6  
10316:R; downstream neighbour: H663\_RS15290 (distance: 148)  
ATCCAAGCACTTGAATAGCCTTGCAAACGGTCATCTATTGAAACGATCGGCTGGTGACTC  
ACCAAATACCATCAGTGTTTCATTGGCGTCATGCGCACCCAGCCTTGACTCTTTTTTCTA  
TGGTCACCTGAATTGAACGCTTTACAAC

>YWC\_RS0101370|Massilia\_alkalitolerans\_GCF\_000427785.1\_ASM42778v1|YWC\_RS0101370  
YWC\_RS0101370; downstream from 1 to 17; size: 17; feature type:gene;  
location:  
Massilia\_alkalitolerans\_GCF\_000427785.1\_ASM42778v1:NZ\_ATYR01000001.1:294709:29472  
5:R; downstream neighbour: YWC\_RS0101365 (distance: 17)  
AACCCGCCGTTGCGGCG

>B594\_RS0108715|Methyloversatilis\_discipulorum\_GCF\_000374245.1\_ASM37424v1|B594\_RS  
0108715 B594\_RS0108715; downstream from 1 to 205; size: 205; feature  
type:gene; location:  
Methyloversatilis\_discipulorum\_GCF\_000374245.1\_ASM37424v1:NZ\_KB910520.1:1870551:1  
870755:D; downstream neighbour: B594\_RS0108720 (distance: 205)  
TCCGTTTTCTCTCTCCTGTCTGACCTCCTCCTTGCGCGAGCAAGGAGCTCGCCGCTGCGG  
GGCAACCCGAGCGGCATTTTTTTGTGCGTGGGTGCTGTCCACCTGCGCAGCAGACTTG  
GTCAAGTTTCTCTGAGGTGGTGCCGTTAAGACCAACAGGCACGCAGTGATTGATGCCCGAA  
CATCCGTCATACACAGGGAAATTCC

>F822\_RS01105|Nitrosospira\_briensis\_GCF\_000619905.2\_ASM61990v2|F822\_RS01105  
F822\_RS01105; downstream from 1 to 382; size: 382; feature type:gene;  
location:  
Nitrosospira\_briensis\_GCF\_000619905.2\_ASM61990v2:NZ\_CP012371.1:237740:238121:D;  
downstream neighbour: F822\_RS01110 (distance: 382)  
CATTCTGCCGGGCTTGAAGAATCGCAGCAAAAAATGAACTGGCCAGCCGATTTCTGTAA  
GTTTCGACAGGCTGCTGGCAACCAACCTCCCGGCGTCATCGATCCGGGAGGTTTCTTTCT  
CCTCTGGTTGAAATCTTTTCTTTCCCGCGCTTCTCTCTCACTTCTTCCGGTTTTTCG  
CTATTTCTCTCTCTAAAGTTTACCGGGTTCCGGCCGTTACAAAGGTGGAGTATTTCAAGT  
TGACTGCCTTTGCTCCAATGCCGGTGAATCAGGCCACGTAAGTGCACGCAATAACCGGCAA  
TGGCTGGGCAATGGCTGCCGACACCGGCAGCGCTGATTATGCAATCAGCACAACAATTCC  
AACTGGAGAAGTGTAGGGGAAT

>ODI\_RS05230|Orrella\_dioscoreae\_GCF\_900089455.1\_OrrDiv1|ODI\_RS05230 ODI\_RS05230;  
downstream from 1 to 129; size: 129; feature type:gene; location:  
Orrella\_dioscoreae\_GCF\_900089455.1\_OrrDiv1:NZ\_FLRC01000010.1:52881:53009:R;  
downstream neighbour: ODI\_RS05225 (distance: 129)  
GCGTCATCCCTCTCCGTGGCCGATAAGGCCAAAAAGCCACGAAAAAGCCCTTTGAACCC  
GGTTTTCAAACCGGGCTTAGAGGAGATCATTCTGGGCGATTGCGTGTTAATTCTAGGCA  
GAGGGTCGT

>D827\_RS11310|Pseudacidovorax\_intermedius\_GCF\_000333675.2\_Pseudacidovorax\_interme  
dius\_NH-1|D827\_RS11310 D827\_RS11310; downstream from 1 to 121; size: 121;  
feature type:gene; location:  
Pseudacidovorax\_intermedius\_GCF\_000333675.2\_Pseudacidovorax\_intermedius\_NH-

1:NZ\_ANOY02000603.1:2105:2225:D; downstream neighbour: D827\_RS11315 (distance: 121)

ATTGAACCCAGGCACGCCGCTCCGAAGTGTGATATGGGCCCGCGATCGGGCCCTTTT  
TGCGGGACCGGCTCAGCCGTCGTCAGGCCAATAGCACCTGATCTTCGCCCTCCAC  
C

>ON18\_RS13280|Pusillimonas\_noertemannii\_GCF\_000308195.1\_PusiNoerBS8|ON18\_RS13280  
ON18\_RS13280; downstream from 1 to 196; size: 196; feature type:gene;  
location:

Pusillimonas\_noertemannii\_GCF\_000308195.1\_PusiNoerBS8:NZ\_AMZF01000045.1:4854:5049  
:D; downstream neighbour: ON18\_RS13285 (distance: 196)  
GGCCTGCAGGCGAACCCACGGCCCGGGCGGCGCGCAAAGGGCGGCCACTTGCAAAGTGT  
GTCTTGGGCGCAAAGCCTGCATTCCGCGGTTTGCCAGAACGCTGATCTAGCTTCTAAAA  
ACCCATTGACGGACGCTTTTGCCGCGCCGATCGGGGTGATCATAGAGCCCCATGCATT  
TATCGAGGATACGCTC

>ACS15\_RS27355|Ralstonia\_insidiosa\_GCF\_001653935.1\_ASM165393v1|ACS15\_RS27355  
ACS15\_RS27355; downstream from 1 to 271; size: 271; feature type:gene;  
location:

Ralstonia\_insidiosa\_GCF\_001653935.1\_ASM165393v1:NZ\_CP012606.1:1954956:1955226:D;  
downstream neighbour: ACS15\_RS27360 (distance: 271)  
GCGGTACCACCGGGATTACGGGACGTACGGGAACGAACGCCGGGAATGACGGGAAATAC  
GGGAACACAACAACAATAGCCGGCAAGTTCGGCACATAACAAGACAGCACAGAACACAGA  
GCAGCAACAGCACAGGGGCTCAGACAGCACAAAAGGGGAAGGGGGTAGGCCGGTTCGTCGC  
AGGAAACTGCGGACCGGCATTTTTTTGCGCCGCGCATGAAGGAAGGGACGGAAAGCAAT  
TTCCGTCCTTTTTTCTTTCGTTTCGGCTTGG

>BLL52\_RS08285|Rhodoferrax\_antarcticus\_GCF\_001938565.1\_ASM193856v1|BLL52\_RS08285  
BLL52\_RS08285; downstream from 1 to 176; size: 176; feature type:gene;  
location:

Rhodoferrax\_antarcticus\_GCF\_001938565.1\_ASM193856v1:NZ\_MSYM01000011.1:274507:27468  
2:R; downstream neighbour: BLL52\_RS08280 (distance: 176)  
GCGGCCTACTCCAAAAATATATTTTTATAGCTACTAACGCTTTGTTTATAAGGGCTAGAA  
GCTTATTTCACTCATAACTCAAGTGACTGGGAAAGCGGTCGATA TGATAGAGAGCAGAGT  
GGCACCTAGCACTGCTCGTCTTTTGAAACACAAGCCCTTCTAAAGTAGACCGTCT

>BTW07\_RS14530|Salinicola\_socius\_GCF\_001937195.1\_ASM193719v1|BTW07\_RS14530  
BTW07\_RS14530; downstream from 1 to 207; size: 207; feature type:gene;  
location:

Salinicola\_socius\_GCF\_001937195.1\_ASM193719v1:NZ\_MSDO01000022.1:19182:19388:D;  
downstream neighbour: BTW07\_RS14535 (distance: 207)  
TTCGGCGATATCTTTCGAAGCGGGCTCCATGGCCGCTTTTTTCATGTCTGCGTTATTTT  
TTCTTTCCCATCCGTGTCGCCGCATCAAGTCGGCTGTGTCGTTGTCGACGAATCACGCT  
TTTCTGATATTTCTACCCTCAAGGGTGATGGTCCCGCTGCCGATA CAGTCATCAGGTTCCG  
CCACGCACTGTCATCGGGAGCATTTAC

>C41B8\_RS07165|Salinisphaera\_hydrothermalis\_GCF\_000732535.1\_ASM73253v1|C41B8\_RS07  
165 C41B8\_RS07165; downstream from 1 to 206; size: 206; feature type:gene;  
location:

Salinisphaera\_hydrothermalis\_GCF\_000732535.1\_ASM73253v1:NZ\_APNK01000007.1:119488:  
119693:R; downstream neighbour: C41B8\_RS07160 (distance: 206)  
CGAACGTATGACGCTGCGCCCGGGCTTGCCCTGGGGCGGGCGTCTTACGCATGCGTC  
TCGCCGTCCGGTGTCTGAGTGCACCGCATCGACGAATCAAAAATCGATGGGCATCCAGC  
GTTCAAGTTCCCATGTGCGCCGGCGTTA TGTGCTGTACGCCTAAACCGTCGTCAAATGCG  
GTCGTGTCTGATCGCCAGGGGTTCCA



>SLIT\_RS02695|Sideroxydans\_lithotrophicus\_GCF\_000025705.1\_ASM2570v1|SLIT\_RS02695  
SLIT\_RS02695; downstream from 1 to 188; size: 188; feature type:gene;  
location:  
Sideroxydans\_lithotrophicus\_GCF\_000025705.1\_ASM2570v1:NC\_013959.1:549846:550033:D  
; downstream neighbour: SLIT\_RS02700 (distance: 188)  
AGTTTACTTTCGAGCGCCGCTACTACTGACGAGATGTATCATCAGCAGTGGCGGCGTTG  
TTGCGTCTGAGGCCCGAACAGCGAAAATGCCGGTGGATATTCGTTTTGATCCATGCAT  
GGCCGGGATGCCTGGCTGTTACGATGCAACAGTAGACTTGAAGAGTGTGACTCAGGGA  
GCGTGATT

>BG74\_RS04485|Sodalis-  
like\_endosymbiont\_of\_Proechinophthirus\_fluctus\_GCF\_001602625.1\_ASM160262v1|BG74\_R  
S04485 BG74\_RS04485; downstream from 1 to 98; size: 98; feature type:gene;  
location: Sodalis-  
like\_endosymbiont\_of\_Proechinophthirus\_fluctus\_GCF\_001602625.1\_ASM160262v1:NZ\_LEC  
R0100040.1:24121:24218:R; downstream neighbour: BG74\_RS04480 (distance: 98)  
GAAGAGTGATGCATTGAATGCCATTTTCACAAACGGATTATTCATCACTGGCAAAAACG  
TTCATTTTCTGGATGCCACTGTCTTGTAAGGAATCACT

>SUTH\_RS04425|Sulfuritalea\_hydrogenivorans\_GCF\_000828635.1\_ASM82863v1|SUTH\_RS0442  
5 SUTH\_RS04425; downstream from 1 to 299; size: 299; feature type:gene;  
location:  
Sulfuritalea\_hydrogenivorans\_GCF\_000828635.1\_ASM82863v1:NZ\_AP012547.1:902267:9025  
65:D; downstream neighbour: SUTH\_RS04430 (distance: 299)  
GGTCGGCAGCAGAACCCGCTCTCCACTAGTTCGTTAGTTATATCCGACGCGCTCCTCCGG  
CAAGCCGGCAGGGGCGGTTCCATTTAGCATAGTCTCGACGGGAATTTTTTCGGCGTGGT  
TTCAGCGCCGACTTTCGATTCATGTTTCGCCCGGCATCCTCTGCCAAGGGCCTCGACCT  
GTGTTGAAACTTGGCTTTGATTGCCGCGAGCCCTCTGTTTGCCGTTATGATTGCATTTCA  
GGCAGGCTCCGAGATAGCATCGTTTCGCAAAAGAACAACAGTTCAGGGTAGGGTCCAAG

>H607\_RS0104250|Tepidiphilus\_margaritifer\_GCF\_000425565.1\_ASM42556v1|H607\_RS01042  
50 H607\_RS0104250; downstream from 1 to 148; size: 148; feature type:gene;  
location:  
Tepidiphilus\_margaritifer\_GCF\_000425565.1\_ASM42556v1:NZ\_AUDR01000015.1:20307:2045  
4:R; downstream neighbour: H607\_RS0104245 (distance: 148)  
CCGCACCGTCATGGCTCCCGCCTGACGCAAATTTCTTCATTCCGTCCTTCGCCAAGGGCG  
CTCTGCTCATGCTACCATTGCATGCCAGGCGTAGGGCCGTGATTCTTGGCCCTTGCTGCG  
GCACTAGCGGCATCGAACGGAGGGCTCT

>C665\_RS11025|Thauera\_aminoaromatica\_GCF\_000310185.1\_ASM31018v1|C665\_RS11025  
C665\_RS11025; downstream from 1 to 192; size: 192; feature type:gene;  
location:  
Thauera\_aminoaromatica\_GCF\_000310185.1\_ASM31018v1:NZ\_AMXD01000063.1:15893:16084:D  
; downstream neighbour: C665\_RS11030 (distance: 192)  
CCCCGGCGGGCCCTCCGGCCCGCATGCAGGTTCCCTACATGGGCCGCGCTGGAAACAGGCG  
GCCCATGTCACGTCCGCGCACGGCGTGGCGTCGCGCCCCGGCGCG **GTTCAAGTTCCCTCCC**  
**CCGCCGCGGTTA**TCCCCTGCGAGAGCCGTGCCGGTCCGTGCGCGGCGCAGCGAAACGCTT  
CGGAGTTTCCCC

>B145\_RS0106465|Uliginosibacterium\_gangwonense\_GCF\_000373965.1\_ASM37396v1|B145\_RS  
0106465 B145\_RS0106465; downstream from 1 to 252; size: 252; feature  
type:gene; location:  
Uliginosibacterium\_gangwonense\_GCF\_000373965.1\_ASM37396v1:NZ\_KB892836.1:193927:19  
4178:R; downstream neighbour: B145\_RS0106460 (distance: 252)  
TGGACTATTGTTGATTTGCCGCAACCCTCCTCAGAACCCTGTGGTGTGTAATCATTGAG  
CCGCCAAGCTTTTGGCGGCTTTTGTATTAAAGTGA **CTTCAAGTTTCCGATTGCGGTGC**  
**CGATA**GCCAGCATGGATGGTGGATAATCCTGTCTTGGGTTTCAAACAAAAGGGCGCGGA



CGCTGAACAAGCGTGTTTATGGCCCTGGCGACACCCGGTTTTTCGCATTCTGCGGCACACA  
AGGGTCTTGAAG

>VBO01S\_RS01450|Variovorax\_boronicumulans\_GCF\_001591345.1\_ASM159134v1|VBO01S\_RS01  
450 VBO01S\_RS01450; downstream from 1 to 62; size: 62; feature type:gene;  
location:  
Variovorax\_boronicumulans\_GCF\_001591345.1\_ASM159134v1:NZ\_BCUS01000002.1:127845:12  
7906:D; downstream neighbour: VBO01S\_RS01455 (distance: 62)  
AAGTGCCCCGGCGCCCGGCGGGTTTTTTGTTTTGGACGCCTCAGGGCATAGGGGAAGC  
GC

>AX739\_RS08130|Xylophilus\_ampelinus\_GCF\_001556675.1\_ASM155667v1|AX739\_RS08130  
AX739\_RS08130; downstream from 1 to 152; size: 152; feature type:gene;  
location:  
Xylophilus\_ampelinus\_GCF\_001556675.1\_ASM155667v1:NZ\_LSJH01000364.1:1806:1957:R;  
downstream neighbour: AX739\_RS08125 (distance: 152)  
TTCTGTTCGGCGCACCCCGACCGGAAACCGCGAACAGGGGCCTCTGAGGGCCCCCTTTTTTC  
ATGGACTGCCCGCCGGCAGATGCAGGCCCAATAGCGTCAACCGCCGAAGCGCCCCCGGCC  
TGAAGCGCCCTCCCCGTTCTCCTCACACGCC
